# Supplementary material for: Transcriptome Analysis and Intraspecific Variation in Spanish Fir (Abies pinsapo Boiss.)
Source: MDPI journal article supplement (doi:10.3390/ijms23169351), 2022-08-19
Supplement: s1 [file s1]

## Supplementary material

**Table S1.** Primer list.

| Primer Name | Identifier      | Gene description                                               | Sequence (5' – 3')       |
|-------------|-----------------|----------------------------------------------------------------|--------------------------|
| qAp_REF1F   | <i>Ap_2641</i>  | Saposin-like aspartyl protease                                 | TTGGATTGCGTATCTTGCTTGC   |
| qAp_REF1R   | <i>Ap_2641</i>  | Saposin-like aspartyl protease                                 | AACATACATFFTTATTGCTTGCCA |
| qAp_REF8F   | <i>Ap_10901</i> | Peptidase<br>S24/S26A/S26B/S26C family<br>protein              | TGCTCCATTCAAGTTGCACCT    |
| qAp_REF8R   | <i>Ap_10901</i> | Peptidase<br>S24/S26A/S26B/S26C family<br>protein              | TGAAATTCCTTGCAGCAGAACA   |
| qAp_1400F   | <i>Ap_1400</i>  | Putative RNA recognition<br>motif domain-containing<br>protein | ACCACCTCGTTCATCATCAGC    |
| qAp_1400R   | <i>Ap_1400</i>  | Putative RNA recognition<br>motif domain-containing<br>protein | GGGGTCTGTTAGCGAAGAGTC    |
| qAp_5633F   | <i>Ap_5633</i>  | Chromomethylase (CMT)                                          | TTCATTCTCGCTCTGGATCCA    |
| qAp_5633R   | <i>Ap_5633</i>  | Chromomethylase (CMT)                                          | GCTAGTCTACTTGGCAGCCTT    |
| qap_14760F  | <i>Ap_14760</i> | Asparagine synthetase                                          | GTGCAAAGTTGGCGTTTCGTA    |
| qap_14760R  | <i>Ap_14760</i> | Asparagine synthetase                                          | GCCCATCAAATACAGCCGTC     |
| qap_22702F  | <i>Ap_22702</i> | SANT domain-containing<br>protein                              | TGAAGCTCCTATGTGATGCCA    |
| qap_22702R  | <i>Ap_22702</i> | SANT domain-containing<br>protein                              | TGCTGCCAATTCCACATATGC    |
| qap_72505F  | <i>Ap_72505</i> | Ribulose biphosphate<br>carboxylase small subunit              | CTGAGACACTCTGTTGGGGTC    |
| qap_72505R  | <i>Ap_72505</i> | Ribulose biphosphate<br>carboxylase small subunit              | AGACGGGCAAAATTGAGCATC    |
| qap_72669F  | <i>Ap_72669</i> | Red chlorophyll catabolite<br>reductase                        | TCTGCTCTACTTGGGAATCGTC   |
| qap_72669R  | <i>Ap_72669</i> | Red chlorophyll catabolite<br>reductase                        | CTCACAGCCATTTCAAATTGCA   |
| qap_84836F  | <i>Ap_84836</i> | Cytochrome P450<br>CYP720B12v2                                 | TCTCTCACGTTTAACCCTGGC    |
| qap_84836R  | <i>Ap_84836</i> | Cytochrome P450<br>CYP720B12v2                                 | ATGGCGATCTGAAGTTTTGCG    |

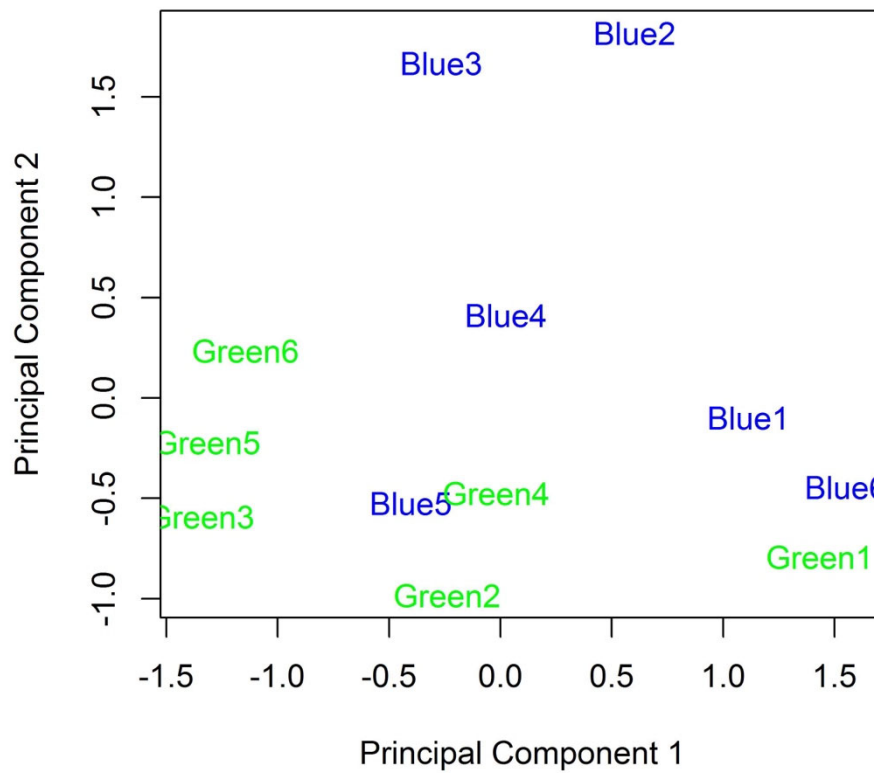

**Figure S1.** Multidimensional scaling plot (MDS) of needles samples from bluish (B) and green (G) trees.

**Dataset S1.** RNA-seq differential expression results

**Dataset S2.** RNA-seq functional enrichment of differentially expressed (DE) transcripts
